# Supplementary material
Source: HighWire-hosted journal article supplement (https://www.cmajopen.ca/highwire/filestream/81300/field_highwire_adjunct_files/2/2019-0149-3-at.pdf)
Supplement: 2019-0149-3-at.pdf [file 2019-0149-3-at.pdf]

**Appendix 3 (as supplied by the authors):** Sensitivity analysis: factors associated with externalizing or internalizing behaviour at age 5 using continuous predictors

|                                     | Externalizing Behaviour |              | Internalizing Behaviour |              |
|-------------------------------------|-------------------------|--------------|-------------------------|--------------|
|                                     | AOR                     | 95% CI       | AOR                     | 95% CI       |
| Maternal ACEs (+1 ACE)              | 1.19                    | (1.08, 1.32) | 1.02                    | (0.94, 1.10) |
| <b>Child covariates</b>             |                         |              |                         |              |
| Child age in months                 | 1.02                    | (0.96, 1.09) | 1.03                    | (0.98, 1.07) |
| Male sex                            | 2.80                    | (1.84, 4.27) | 0.82                    | (0.61, 1.09) |
| Negative affect                     | 1.54                    | (1.21, 1.97) | 2.03                    | (1.67, 2.47) |
| <b>Maternal Covariates</b>          |                         |              |                         |              |
| Maternal age                        | 1.00                    | (0.95, 1.04) | 0.98                    | (0.94, 1.01) |
| Anxiety symptoms at 5 years         | 1.10                    | (1.01, 1.18) | 1.02                    | (0.96, 1.07) |
| Depression symptoms at 5 years      | 1.01                    | (0.98, 1.04) | 1.03                    | (1.01, 1.05) |
| Maternal neuroticism                | 1.00                    | (0.93, 1.07) | 1.10                    | (1.04, 1.16) |
| Ineffective/hostile parenting       | 1.32                    | (1.25, 1.39) | 1.07                    | (1.03, 1.11) |
| <b>Socio-demographic covariates</b> |                         |              |                         |              |
| Family income (per \$50K increase)  | 0.85                    | (0.72, 1.02) | 0.99                    | (0.87, 1.13) |
| Minority ethnicity                  | 0.90                    | (0.53, 1.52) | 1.58                    | (1.11, 2.24) |
| Two biological parent home          | Ref                     | --           | Ref                     | --           |
| Blended home                        | 1.65                    | (0.47, 5.52) | 1.64                    | (0.59, 4.57) |
| Single parent home                  | 0.63                    | (0.20, 2.01) | 0.78                    | (0.34, 1.78) |
| Other                               | 2.99                    | (0.98, 9.14) | 2.51                    | (1.02, 6.14) |

ACEs: Adverse Childhood Experiences, Negative affect: Rothbart Child Temperament Scale; Anxiety: Spielberger State Anxiety Index; Depression: Center for Epidemiologic Studies – Depression Scale; Neuroticism: Eysenck Personality Questionnaire Revised, Parenting: National Longitudinal Survey of Children and Youth, CAD: Canadian Dollar

AOR: adjusted odds ratios - mutually adjusted for all variables in the model

For externalizing n=1622 ; for internalizing n=1620

Coefficients represent the estimated effect of a 1 point increase on the corresponding scale (i.e. each 1 point increase in anxiety symptoms on the anxiety scale for mothers corresponds to a 1.1 increased odds of externalizing behaviour in children)
